# Supplementary material
Source: PubMed Central journal article supplement (PMC2992234)
Supplement: supp_M110.118471_jbc.M110.118471-1.pdf [file supp_M110.118471_jbc.M110.118471-1.pdf]

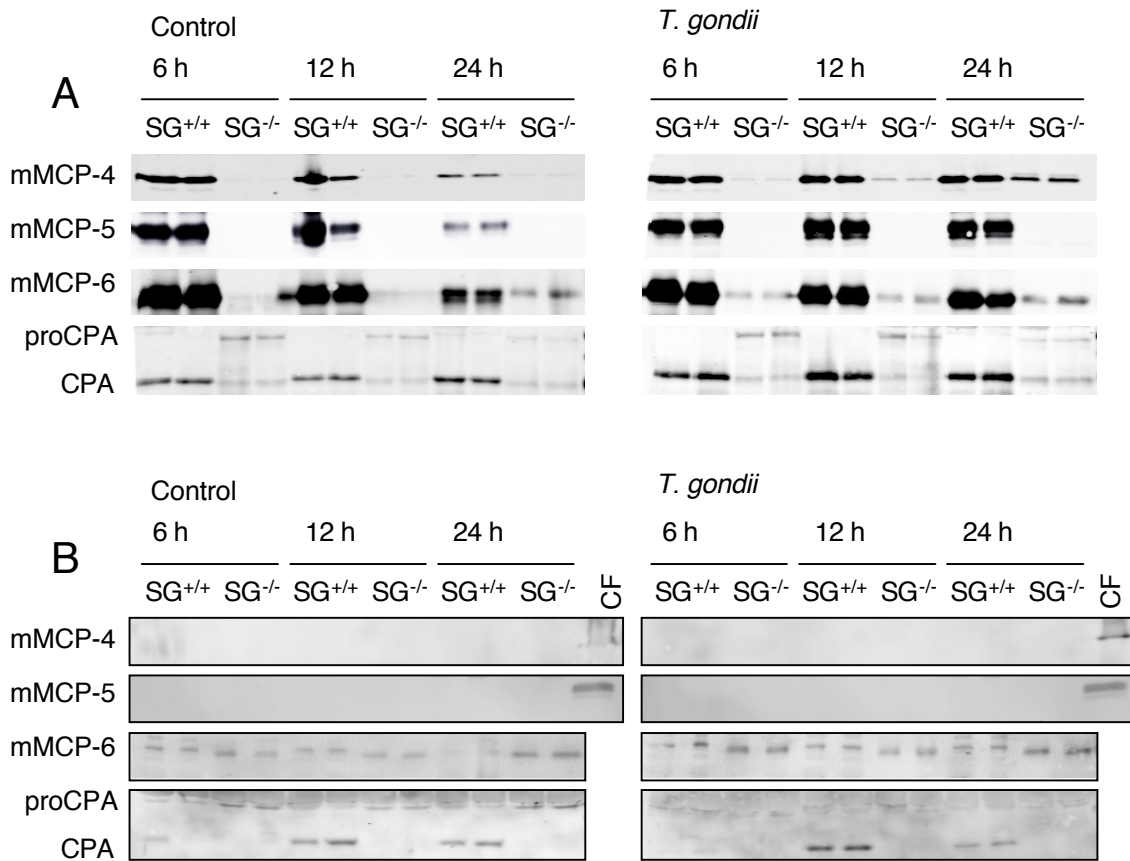

Soluble *T. gondii* antigen (STag) induce weak MC protease release in SG<sup>+/+</sup> and SG<sup>-/-</sup> PCMCs. Cell lysates (A) and supernatants (B) of PCMC cultures stimulated with STag (20  $\mu$ g/ml) for indicated time periods and non-stimulated PCMCs (control) were assayed for MC protease expression by Western blot analyses. CF = cellular fraction, of WT PCMCs was included as a positive control of for analysis of the mMCP-4 and mMCP-5 expression in (B).

Supplement Fig 1. Sawesi et al.

**SUPPLEMENT TABLE I**

Protease activities in PCMCs<sup>a</sup>

| Time point | PCMCs<br>(N = 3 per<br>genotype) | Chymotrypsin-like<br>activity <sup>b</sup><br>Substrate S-2586 | Trypsin-like<br>activity <sup>b</sup><br>Substrate S-2288 | Carboxypeptidase<br>A-like activity <sup>b</sup><br>Substrate M-2245 |
|------------|----------------------------------|----------------------------------------------------------------|-----------------------------------------------------------|----------------------------------------------------------------------|
| 6 h        | SG <sup>+/+</sup>                | 7.6 ± 0.2                                                      | 12.8 ± 0.2                                                | - 1.2 ± 0.1                                                          |
|            | SG <sup>-/-</sup>                | 0.7 ± 0.0                                                      | 0.8 ± 0.0                                                 | ND <sup>c</sup>                                                      |
| 24 h       | SG <sup>+/+</sup>                | 14 ± 0.5                                                       | 12.4 ± 0.1                                                | - 4.7 ± 0.2                                                          |
|            | SG <sup>-/-</sup>                | 0.6 ± 0.0                                                      | 1.1 ± 0.1                                                 | - 1.5 ± 0.1                                                          |
| 48 h       | SG <sup>+/+</sup>                | 27 ± 2                                                         | 21.7 ± 0.2                                                | - 4.7 ± 0.1                                                          |
|            | SG <sup>-/-</sup>                | 0.8 ± 0.1                                                      | 1.6 ± 0.1                                                 | - 1.3 ± 0.3                                                          |

<sup>a</sup>Cell free supernatants from SG<sup>+/+</sup> and SG<sup>-/-</sup> peritoneal cell derived mast cells (PCMCs) stimulated with soluble *T. gondii* antigen (STag) (n=3) were assayed for chymotrypsin-like, trypsin-like, and CPA-like activities as described in 'Experimental Procedures'.

<sup>b</sup>Activities are expressed as mean change in absorbance ( $\delta$ mOD/(min x ml of cell free exudates) ± SEM). Note that hydrolysis of the CPA substrate results in decreased absorbance.

<sup>c</sup>ND, not detected.

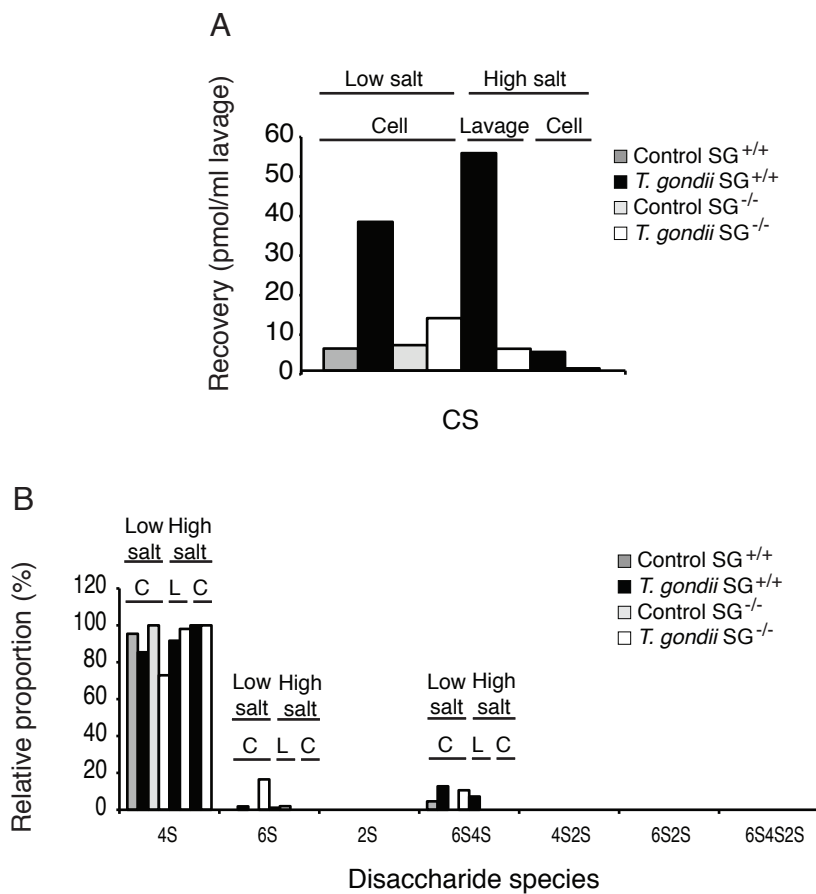

A) Recovery of CS from peritoneal lavage of naïve and *T. gondii* challenged mice. Naïve and challenged animals were flushed with PBS (*Low salt*) followed by a high saline buffer (1.5 M NaCl) (*High salt*). GAGs were isolated from lavage (L) and cell fraction (C) and analyzed as described in 'Experimental Procedures'.  
 B) Disaccharide composition of fractions in A after chondroitinase ABC lyase digestion. The disaccharide species created by lyase treatment are indicated:  $\Delta$ HexA-GalNAc4S (4S),  $\Delta$ HexA-GalNAc6S (6S),  $\Delta$ HexA2S-GalNAc (2S),  $\Delta$ HexA-GalNAc4,6S (6S4S),  $\Delta$ HexA2S-GalNAc4S (4S2S),  $\Delta$ HexA2S-GalNAc6S (6S2S),  $\Delta$ HexA2S-GalNAc4,6S (6S4S2S).
